# Supplementary material for: Different nucleosomal architectures at early and late replicating origins in Saccharomyces cerevisiae
Source: PubMed Central journal article supplement (PMC4176565; doi:10.1186/1471-2164-15-791), 2014-09-13
Supplement: 12864_2014_6476_MOESM2_ESM.pdf [file 12864_2014_6476_MOESM2_ESM.pdf]

**A**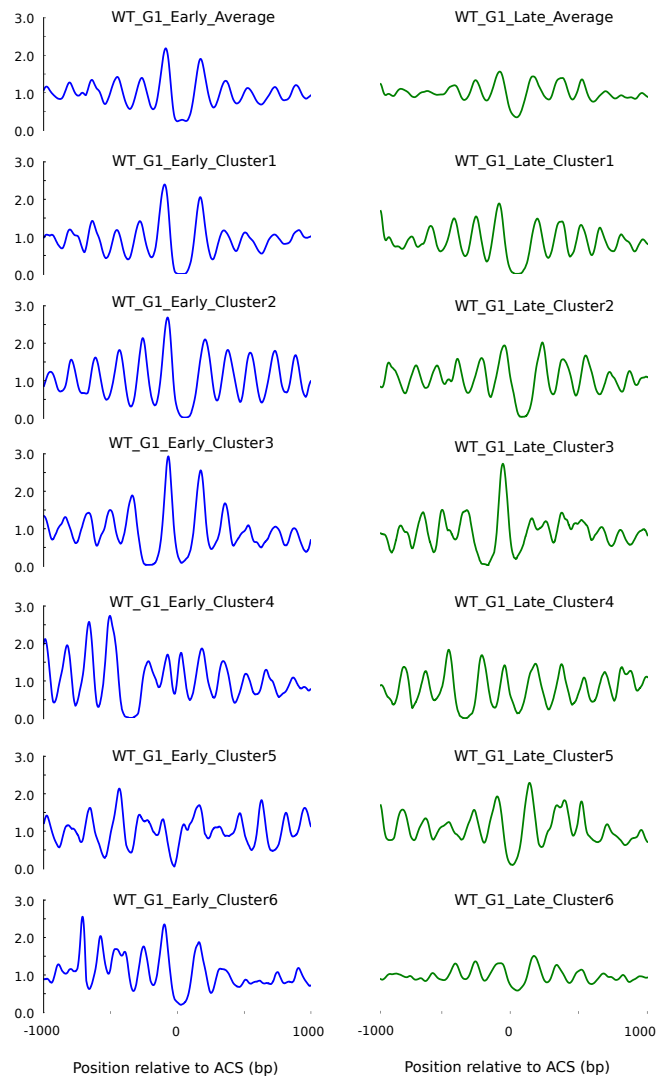**B**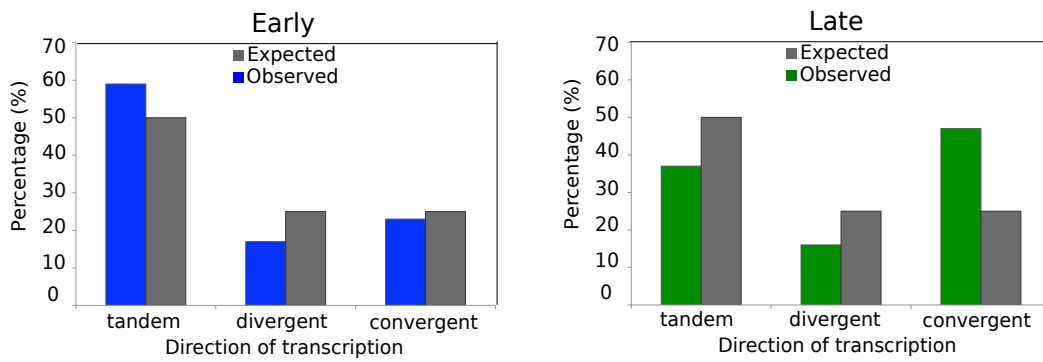**C**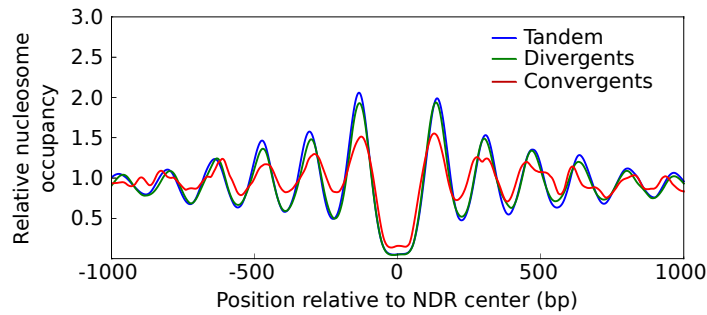

Supplementary Figure 1
